# Supplementary material for: Instant One-Pot Green Synthesis of Functional Ultra-Stable Gold Nanoparticles: Vaginal Candidiasis Point-of-Care Case Study
Source: Preprints.org preprint supplement (doi:10.20944/preprints202405.1467.v1), 2024-05-23
Supplement: Supplementary file 1 [file Biosensors_USGNP_Supplementary Material.docx]

**Instant One-Pot Green Synthesis of Functional Ultra-Stable Gold Nanoparticles: Vaginal Candidiasis Point-of-Care Case Study**

Mohamed Sallam *a,b,c, Kimberley Clack a,b, Ema Romão d, Cong Minh Nguyen a,b, Amandeep Singh Pannu a, Tanzena Tanny a,b, Frank Sainsbury b,c, Nam-Trung Nguyen a, Pieter De Pauw e, Nick Devoogdt f, Nobuo Kimizuka g,h, Serge Muyldermans e

*a Queensland Micro- and Nanotechnology Centre, Griffith University, Nthan Campus, Nathan, QLD 4111, Australia*

*b School of Environment and Science, Griffith University, Nathan Campus, Nathan, QLD 4111, Australia*

*c Griffith Institute for Drug Discovery, Griffith University, Nathan Campus, Nathan, QLD 4111, Australia*

*d Vlaams Instituut voor Biotechnologie, Nanobody Core, Vrije Universiteit Brussel, 1050 Brussels, Belgium*

*e Laboratory of Molecular Imaging and Therapy, Vrije Universiteit Brussel, 1090 Brussels, Belgium., Belgium*

*f Laboratory of Cellular and Molecular Immunology, Vrije Universiteit Brussel, 1050 Brussels, Belgium*

*g Department of Applied Chemistry, Graduate School of Engineering, Kyushu University, 744 Moto-oka, Nishi-ku, Fukuoka 819-0395, Japan*

*h Center for Molecular Systems, Kyushu University, 744 Moto-oka, Nishi-ku, Fukuoka 819-0395, Japan*

* Corresponding author. Queensland Micro- and Nanotechnology Centre, School of Environment and Science, Griffith Institute for Drug Discovery, Griffith University, Nathan Campus, Nathan, Queensland, Australia.

*E-mail address:* [mohamed.sallam@griffithuni.edu.au](mailto:mohamed.sallam@griffithuni.edu.au) (M. Sallam).

**Appendix A. Supplementary data**

Supplementary data to this article can be found online at https://doi.org/xx.xxx/j/biosensors.2024.xxxxxx.
